# Supplementary figures and images for: Telephone Monitoring and Support After Discharge From Residential PTSD Treatment: A Randomized Controlled Trial
Source: Atypon-hosted journal article supplement (doi:10.1176/appi.ps.201200142), 2013-01-01

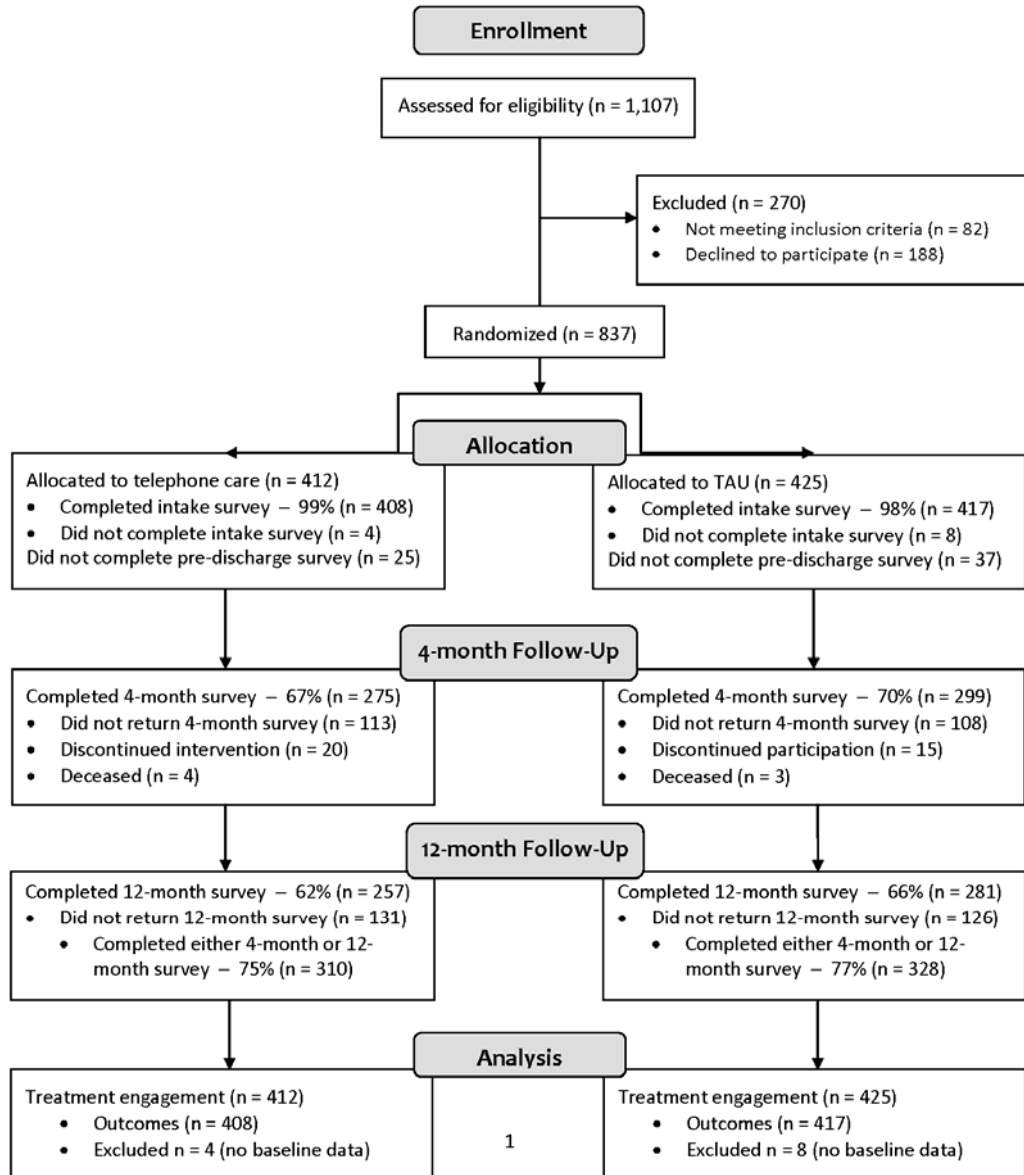

Supplement: 13_ds001.pdf [file 13_ds001.pdf]
